# Supplementary material for: Degradation of Benzotriazole UV Stabilizers in PAA/d-Electron Metal Ions Systems—Removal Kinetics, Products and Mechanism Evaluation
Source: MDPI journal article supplement (doi:10.3390/molecules27103349), 2022-05-23
Supplement: s1 [file s1]

---

## Supplementary Information

### Degradation of benzotriazole UV stabilizers in PAA/d-electron metal ions systems—removal kinetics, products and mechanism evaluation

Dariusz Kiejza <sup>1</sup>, Joanna Karpińska <sup>2</sup> and Urszula Kotowska <sup>2,\*</sup>

<sup>1</sup> Doctoral School of Exact and Natural Sciences, University of Białystok, Ciołkowskiego 1K St., 15-245 Białystok, Poland; d.kiejza@uwb.edu.pl

<sup>2</sup> Department of Analytical and Inorganic Chemistry, Faculty of Chemistry, University of Białystok, Ciołkowskiego 1K St., 15-245 Białystok, Poland; joasia@uwb.edu.pl (JK), ukrajew@uwb.edu.pl (UK)

\* Correspondence: ukrajew@uwb.edu.pl; Tel.: +48 85 738 8111

**Table S1.** The chemical structure, chemical abstract service (CAS) registry number, molecular weights (MW), octanol-water partition coefficients (log K<sub>ow</sub>), acid dissociation constants (pK<sub>a</sub>), quantification and identification ions (m/z) of target benzotriazole UV stabilizers.

| Systematic name, other names              | Structure                                                                          | CAS number | MW (g/mol) | log K <sub>ow</sub> | pK <sub>a</sub> | Quantification and identification ions (m/z) <sup>a</sup> |
|-------------------------------------------|------------------------------------------------------------------------------------|------------|------------|---------------------|-----------------|-----------------------------------------------------------|
| <b>UV-P</b><br>drometrizole, Tinuvin P    | 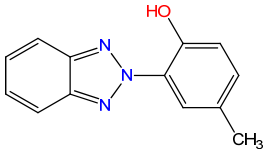  | 2440-22-4  | 225.25     | 4.2                 | 8.15            | 168, 196, <b>225</b>                                      |
| <b>UV-326</b><br>bumetrizole, Tinuvin 326 |   | 3896-11-5  | 315.8      | 5.52                | 9.49            | 272, <b>300</b> , 315                                     |
| <b>UV-327</b><br>Tinuvin 327              |  | 3864-99-1  | 357.88     | 6.75                | 9.41            | 314, <b>342</b> , 357                                     |

---

**UV-328**  
Tinuvin 328

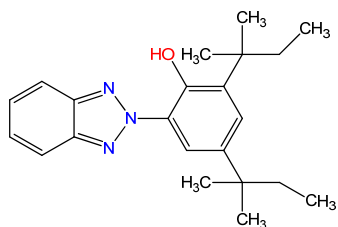

25973-55-1

351.49

7.22

8.73

**322**, 336, 351

**UV-329**  
octrizole, Tinuvin 329

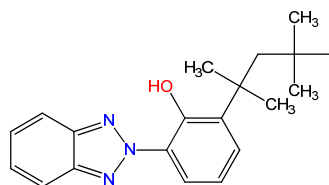

3147-75-9

323.44

6.2

–

**252**, 224, 323

---

<sup>a</sup> bolded ions selected for quantification.

### Synthesis of peracetic acid

Peracetic acid (PAA) was synthesized according to procedure described by [1]. 10 mL of glacial acetic acid was placed in a ground glass bottle. Then 0.94 mL of 95 % sulfuric acid was added. In the next step, 10 ml of 30 % hydrogen peroxide was carefully added dropwise. The bottle was placed in an ice bath and continuously mixed with a magnetic stirrer for 90 minutes. After this time the PAA concentration is about 6 %. After 48 hours, when an equilibrium between the substrates and products is established, 16 % peracetic acid is reached. PAA was stored at 4 °C for no more than a month. PAA working solutions were prepared by dilution in deionized water and stored at 4 °C for no longer than 2 days.

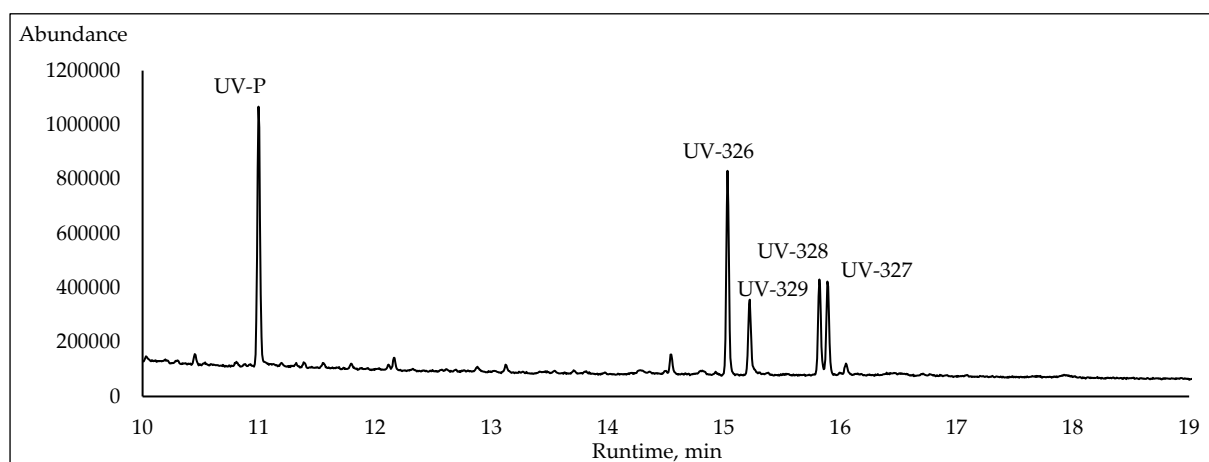

Figure S1. Chromatogram of the studied benzotriazole UV stabilizers.

#### UV-P

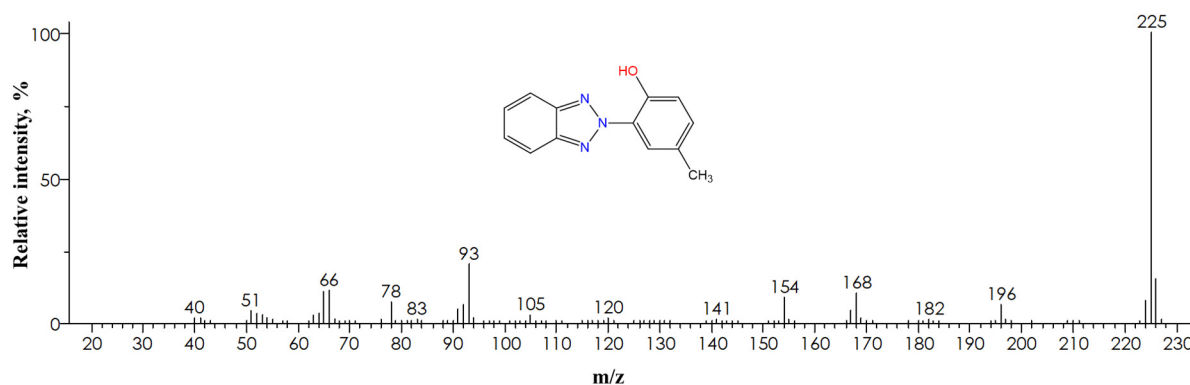

#### UV-326

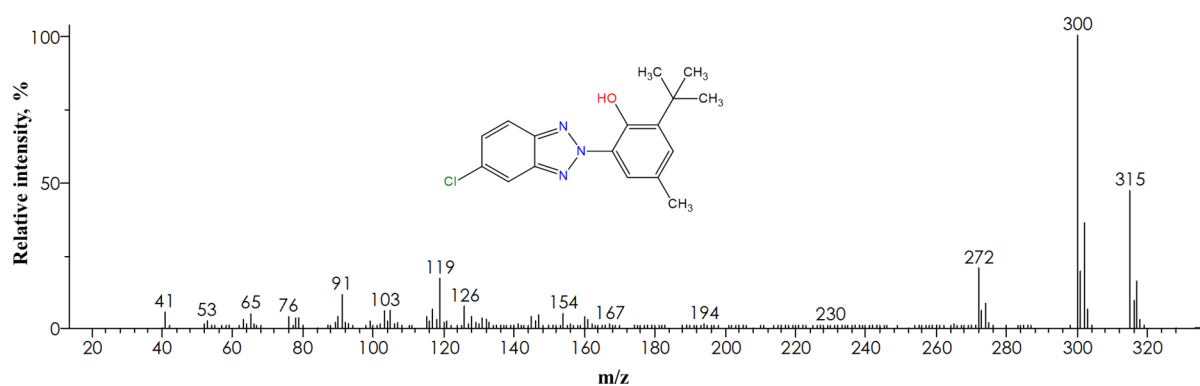

UV-327

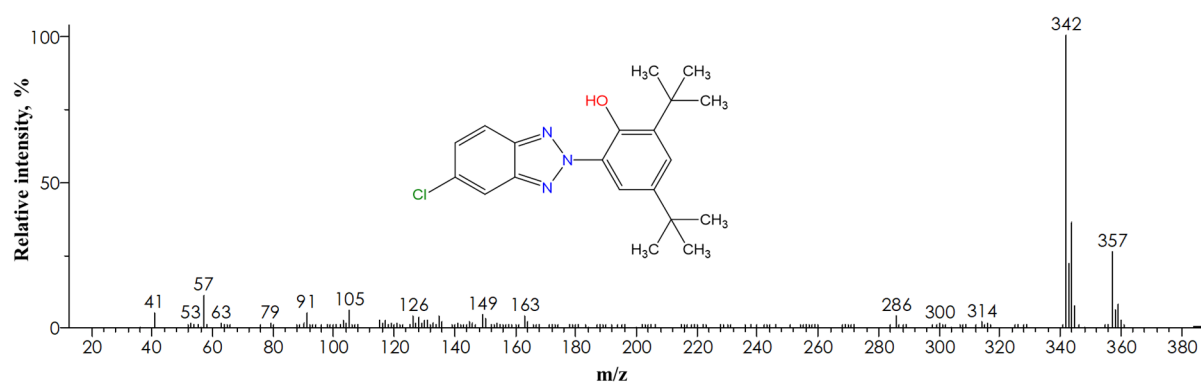

UV-328

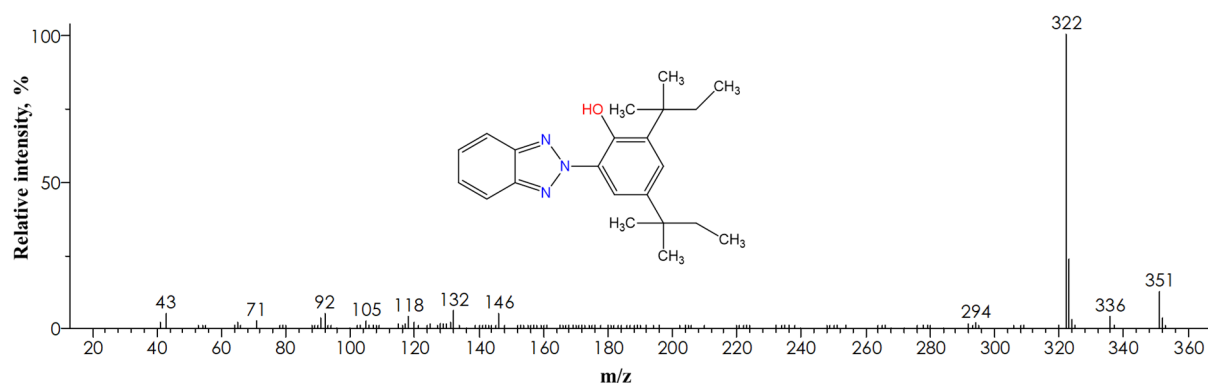

UV-329

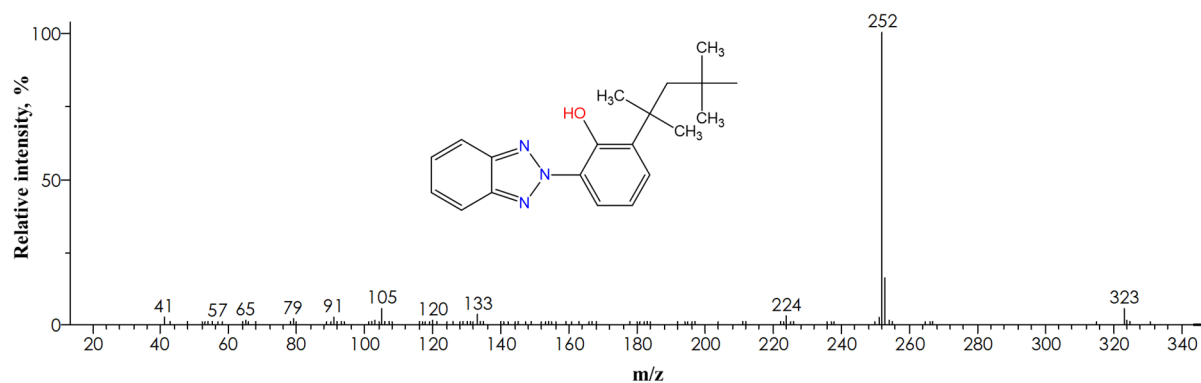

**Figure S2.** Mass spectra recorded during GC-MS analysis of studied compounds.

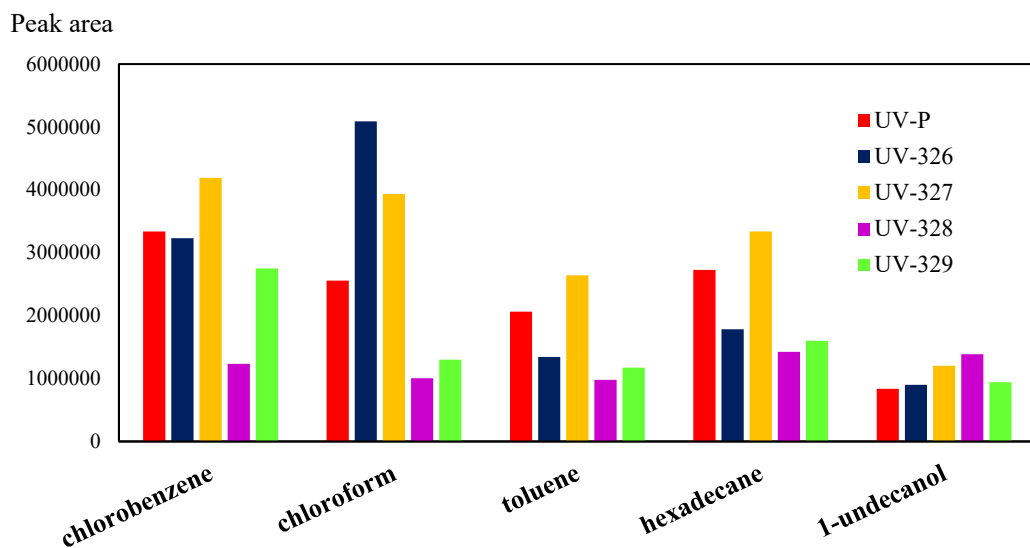

**Figure S3.** Comparison of the UV stabilizers peak areas depending on the different extractants.

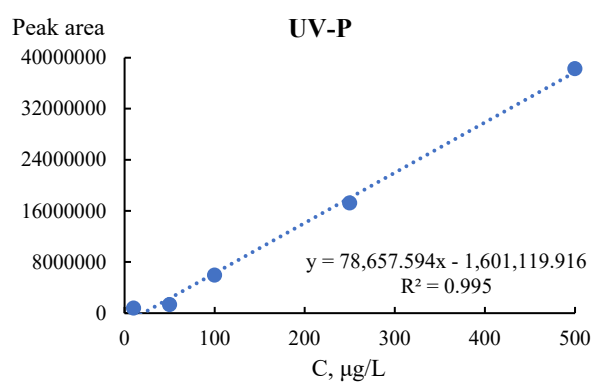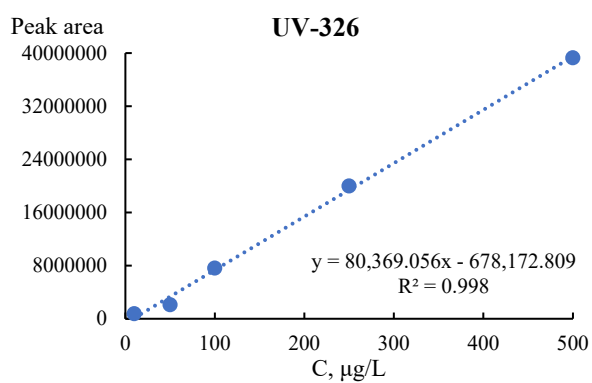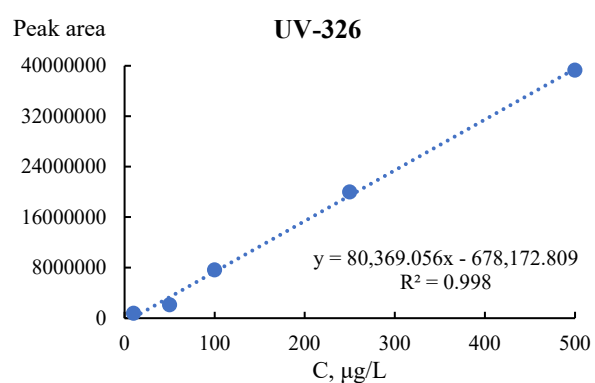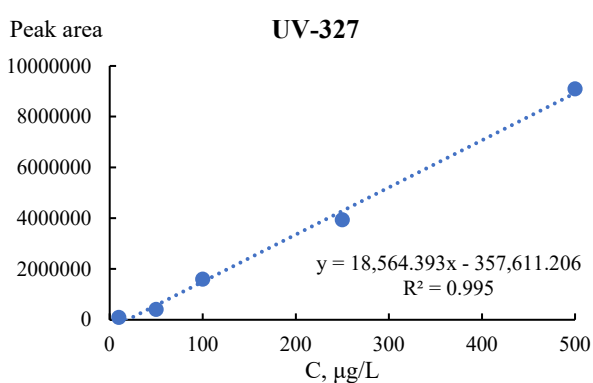

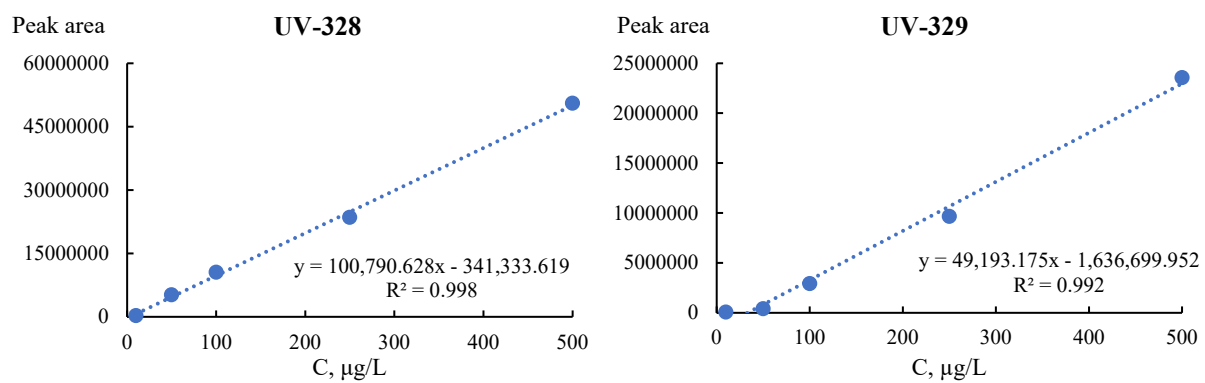

**Figure S4.** Calibration curves used to calculate temporary benzotriazole concentrations.

**Table S2.** Experimental and predicted removal efficiency values for benzotriazole UV stabilizers degradation in Fe<sup>2+</sup>/PAA process.

| Run | [PAA] <sub>0</sub><br>(mg/L) | [Me <sup>2+</sup> ] <sub>0</sub><br>(mol/L) | pH  | UV-P  |        | UV-326 |       | UV-327 |       | UV-328 |       | UV-329 |       |
|-----|------------------------------|---------------------------------------------|-----|-------|--------|--------|-------|--------|-------|--------|-------|--------|-------|
|     |                              |                                             |     | Exp.  | Pred.  | Exp.   | Pred. | Exp.   | Pred. | Exp.   | Pred. | Exp.   | Pred. |
| 1   | 45                           | 3.45·10 <sup>-4</sup>                       | 4.6 | 82.86 | 78.75  | 57.35  | 63.37 | 28.61  | 29.45 | 28.61  | 29.45 | 70.44  | 76.42 |
| 2   | 45                           | 3.45·10 <sup>-4</sup>                       | 3.4 | 98.01 | 100.00 | 76.25  | 77.84 | 37.41  | 37.92 | 37.41  | 37.92 | 80.50  | 73.06 |
| 3   | 45                           | 1.45·10 <sup>-5</sup>                       | 4.6 | 98.76 | 100.00 | 73.69  | 72.96 | 53.90  | 44.36 | 53.90  | 44.36 | 80.80  | 84.41 |
| 4   | 45                           | 1.45·10 <sup>-5</sup>                       | 3.4 | 92.80 | 83.59  | 55.32  | 60.78 | 33.39  | 36.43 | 33.39  | 36.43 | 58.32  | 76.78 |
| 5   | 15                           | 3.45·10 <sup>-4</sup>                       | 4.6 | 45.62 | 51.20  | 66.91  | 64.61 | 44.08  | 44.05 | 44.08  | 44.05 | 70.02  | 77.33 |
| 6   | 15                           | 3.45·10 <sup>-4</sup>                       | 3.4 | 95.29 | 90.72  | 75.48  | 79.08 | 31.60  | 36.01 | 31.60  | 36.01 | 72.29  | 73.97 |
| 7   | 15                           | 1.45·10 <sup>-5</sup>                       | 4.6 | 97.29 | 96.09  | 75.22  | 74.20 | 50.80  | 51.11 | 50.80  | 51.11 | 80.80  | 85.31 |
| 8   | 15                           | 1.45·10 <sup>-5</sup>                       | 3.4 | 89.39 | 92.16  | 49.54  | 62.02 | 18.54  | 26.66 | 18.54  | 26.66 | 50.11  | 77.69 |
| 9   | 55                           | 7·10 <sup>-5</sup>                          | 4   | 95.52 | 97.90  | 67.55  | 66.21 | 35.68  | 39.68 | 35.68  | 39.68 | 74.00  | 78.33 |
| 10  | 5                            | 7·10 <sup>-5</sup>                          | 4   | 94.80 | 93.05  | 65.49  | 68.28 | 46.12  | 39.36 | 46.12  | 39.36 | 74.52  | 79.84 |
| 11  | 30                           | 1·10 <sup>-3</sup>                          | 4   | 88.42 | 88.34  | 65.51  | 64.61 | 43.00  | 48.98 | 24.81  | 24.23 | 74.41  | 73.83 |



|    |    |                   |   |       |        |       |       |       |       |       |       |       |       |
|----|----|-------------------|---|-------|--------|-------|-------|-------|-------|-------|-------|-------|-------|
| 12 | 30 | $5 \cdot 10^{-6}$ | 4 | 96.80 | 100.00 | 55.44 | 66.56 | 35.31 | 26.58 | 27.25 | 41.57 | 75.54 | 80.85 |
| 13 | 30 | $7 \cdot 10^{-5}$ | 5 | 88.59 | 85.19  | 64.78 | 76.62 | 25.38 | 41.29 | 43.00 | 48.98 | 82.29 | 86.63 |
| 14 | 30 | $7 \cdot 10^{-5}$ | 3 | 73.20 | 77.22  | 58.76 | 63.78 | 47.31 | 41.29 | 35.31 | 26.58 | 76.34 | 75.12 |
| 15 | 30 | $7 \cdot 10^{-5}$ | 4 | 98.13 | 98.01  | 69.46 | 67.68 | 45.78 | 41.29 | 25.38 | 41.29 | 85.20 | 79.40 |
| 16 | 30 | $7 \cdot 10^{-5}$ | 4 | 98.64 | 98.01  | 77.01 | 67.68 | 47.83 | 41.29 | 47.31 | 41.29 | 92.07 | 79.40 |
| 17 | 30 | $7 \cdot 10^{-5}$ | 4 | 98.70 | 98.01  | 77.37 | 67.68 | 52.05 | 41.29 | 45.78 | 41.29 | 93.66 | 79.40 |
| 18 | 30 | $7 \cdot 10^{-5}$ | 4 | 99.02 | 98.01  | 77.74 | 67.68 | 45.25 | 41.29 | 47.83 | 41.29 | 94.78 | 79.40 |
| 19 | 30 | $7 \cdot 10^{-5}$ | 4 | 98.96 | 98.01  | 81.38 | 67.68 | 43.00 | 48.98 | 52.05 | 41.29 | 95.96 | 79.40 |
| 20 | 30 | $7 \cdot 10^{-5}$ | 4 | 98.62 | 98.01  | 76.76 | 67.68 | 35.31 | 26.58 | 45.25 | 41.29 | 93.89 | 79.40 |

**Table S3.** Experimental and predicted removal efficiency for benzotriazole UV stabilizers degradation in Co<sup>2+</sup>/PAA process.

| Run | [PAA] <sub>0</sub><br>(mg/L) | [Me <sup>2+</sup> ] <sub>0</sub><br>(mol/L) | pH  | UV-P  |       | UV-326 |        | UV-327 |        | UV-328 |        | UV-329 |        |
|-----|------------------------------|---------------------------------------------|-----|-------|-------|--------|--------|--------|--------|--------|--------|--------|--------|
|     |                              |                                             |     | Exp.  | Pred. | Exp.   | Pred.  | Exp.   | Pred.  | Exp.   | Pred.  | Exp.   | Pred.  |
| 1   | 45                           | 3.45·10 <sup>-4</sup>                       | 7   | 70.20 | 79.37 | 91.01  | 100.00 | 87.55  | 94.98  | 83.48  | 99.61  | 94.67  | 100.00 |
| 2   | 45                           | 3.45·10 <sup>-4</sup>                       | 4   | 89.77 | 85.73 | 94.13  | 97.24  | 93.56  | 100.00 | 91.72  | 96.20  | 96.62  | 100.00 |
| 3   | 45                           | 1.45·10 <sup>-5</sup>                       | 7   | 54.13 | 58.22 | 36.99  | 55.25  | 15.66  | 45.78  | 6.57   | 39.82  | 33.31  | 64.98  |
| 4   | 45                           | 1.45·10 <sup>-5</sup>                       | 4   | 59.23 | 59.14 | 33.35  | 46.27  | 16.56  | 32.86  | 1.68   | 15.87  | 29.48  | 42.76  |
| 5   | 15                           | 3.45·10 <sup>-4</sup>                       | 7   | 85.54 | 81.17 | 97.44  | 100.00 | 96.76  | 100.00 | 95.63  | 100.00 | 99.02  | 100.00 |
| 6   | 15                           | 3.45·10 <sup>-4</sup>                       | 4   | 84.20 | 93.85 | 92.99  | 97.24  | 91.62  | 99.49  | 88.71  | 100.00 | 96.44  | 100.00 |
| 7   | 15                           | 1.45·10 <sup>-5</sup>                       | 7   | 51.35 | 53.38 | 20.10  | 55.25  | 29.03  | 60.73  | 3.93   | 46.71  | 18.51  | 53.44  |
| 8   | 15                           | 1.45·10 <sup>-5</sup>                       | 4   | 50.43 | 60.63 | 23.84  | 46.27  | 6.21   | 30.37  | 1.27   | 22.76  | 7.93   | 46.03  |
| 9   | 55                           | 7·10 <sup>-5</sup>                          | 5.5 | 62.92 | 63.13 | 78.68  | 66.76  | 72.79  | 55.22  | 65.47  | 43.55  | 84.80  | 67.85  |
| 10  | 5                            | 7·10 <sup>-5</sup>                          | 5.5 | 63.46 | 62.20 | 93.51  | 66.76  | 91.97  | 65.61  | 89.83  | 55.03  | 95.84  | 63.27  |
| 11  | 30                           | 1·10 <sup>-3</sup>                          | 5.5 | 91.24 | 90.20 | 90.15  | 87.04  | 89.17  | 85.50  | 85.99  | 81.42  | 95.27  | 90.88  |

---

|    |    |                   |     |       |       |       |       |       |       |       |       |       |       |
|----|----|-------------------|-----|-------|-------|-------|-------|-------|-------|-------|-------|-------|-------|
| 12 | 30 | $5 \cdot 10^{-6}$ | 5.5 | 47.16 | 62.40 | 41.04 | 53.29 | 28.61 | 44.82 | 6.82  | 40.05 | 42.89 | 66.02 |
| 13 | 30 | $7 \cdot 10^{-5}$ | 8   | 59.55 | 56.19 | 93.50 | 61.48 | 95.14 | 62.39 | 95.84 | 52.93 | 95.97 | 61.30 |
| 14 | 30 | $7 \cdot 10^{-5}$ | 3   | 70.75 | 64.52 | 57.71 | 46.51 | 49.23 | 31.89 | 32.57 | 18.76 | 63.93 | 40.24 |
| 15 | 30 | $7 \cdot 10^{-5}$ | 5.5 | 74.57 | 69.30 | 75.96 | 66.76 | 70.50 | 60.42 | 73.76 | 58.71 | 93.41 | 81.15 |
| 16 | 30 | $7 \cdot 10^{-5}$ | 5.5 | 74.34 | 69.30 | 76.79 | 66.76 | 71.85 | 60.42 | 73.56 | 58.71 | 93.03 | 81.15 |
| 17 | 30 | $7 \cdot 10^{-5}$ | 5.5 | 75.35 | 69.30 | 71.59 | 66.76 | 67.83 | 60.42 | 76.02 | 58.71 | 94.01 | 81.15 |
| 18 | 30 | $7 \cdot 10^{-5}$ | 5.5 | 76.23 | 69.30 | 72.02 | 66.76 | 66.99 | 60.42 | 66.46 | 58.71 | 92.13 | 81.15 |
| 19 | 30 | $7 \cdot 10^{-5}$ | 5.5 | 73.35 | 69.30 | 72.57 | 66.76 | 74.71 | 60.42 | 67.58 | 58.71 | 93.33 | 81.15 |
| 20 | 30 | $7 \cdot 10^{-5}$ | 5.5 | 72.16 | 69.30 | 78.93 | 66.76 | 68.29 | 60.42 | 67.68 | 58.71 | 93.98 | 81.15 |

---

**Table S4.** ANOVA results for UV-P removal process in Fe<sup>2+</sup>/PAA system.

| Source of variation               | Sum of squares                    | DF | Mean square | F-value | p-value  |
|-----------------------------------|-----------------------------------|----|-------------|---------|----------|
| PAA (square)                      | 231.39                            | 1  | 231.39      | 111.35  | 0.815095 |
| Fe <sup>2+</sup> (linear)         | 1829.66                           | 1  | 1829.66     | 880.51  | 0.668419 |
| Fe <sup>2+</sup> (square)         | 761.42                            | 1  | 761.42      | 366.42  | 0.664894 |
| pH (linear)                       | 141.74                            | 1  | 141.74      | 68.21   | 0.197092 |
| pH (square)                       | 159.86                            | 1  | 159.86      | 76.93   | 0.645401 |
| PAA-Fe <sup>2+</sup> interactions | 41.21                             | 1  | 41.21       | 19.83   | 0.549233 |
| PAA-pH interactions               | 90.68                             | 1  | 90.68       | 43.64   | 0.269201 |
| Fe <sup>2+</sup> -pH interactions | 17.44                             | 1  | 17.44       | 8.39    | 0.237537 |
| Lack of fit                       | 534.35                            | 6  | 89.06       |         |          |
| Pure error                        | 10.39                             | 5  | 2.08        |         |          |
| Total                             | 3221.50                           | 19 |             |         |          |
| R <sup>2</sup> =0.831             | R <sup>2</sup> (adjusted) = 0.708 |    |             |         |          |

**Table S5.** ANOVA results for UV-326 removal process in Fe<sup>2+</sup>/PAA system.

| Source of variation       | Sum of squares                    | DF | Mean square | F-value | p-value  |
|---------------------------|-----------------------------------|----|-------------|---------|----------|
| Fe <sup>2+</sup> (linear) | 6283.22                           | 1  | 6283.22     | 694.32  | 0.668419 |
| Fe <sup>2+</sup> (square) | 3527.49                           | 1  | 3527.49     | 389.80  | 0.664894 |
| pH (linear)               | 273.44                            | 1  | 273.44      | 30.22   | 0.197092 |
| pH (square)               | 285.90                            | 1  | 285.90      | 31.59   | 0.645401 |
| Lack of fit               | 5116.54                           | 10 | 511.65      |         |          |
| Pure error                | 45.25                             | 5  | 9.05        |         |          |
| Total                     | 12106.62                          | 19 |             |         |          |
| R <sup>2</sup> =0.574     | R <sup>2</sup> (adjusted) = 0.460 |    |             |         |          |

**Table S6.** ANOVA results for UV-327 removal process in Fe<sup>2+</sup>/PAA system.

| Source of variation               | Sum of squares                    | DF | Mean square | F-value | p-value  |
|-----------------------------------|-----------------------------------|----|-------------|---------|----------|
| PAA (linear)                      | 131.71                            | 1  | 131.71      | 15.46   | 0.011055 |
| Fe <sup>2+</sup> (linear)         | 8463.52                           | 1  | 8463.52     | 993.16  | 0.000001 |
| Fe <sup>2+</sup> (square)         | 4649.28                           | 1  | 4649.28     | 545.56  | 0.000003 |
| pH (linear)                       | 418.03                            | 1  | 418.03      | 49.05   | 0.000914 |
| pH (square)                       | 309.06                            | 1  | 309.06      | 36.27   | 0.001816 |
| PAA-pH interactions               | 152.00                            | 1  | 152.00      | 17.84   | 0.008301 |
| Fe <sup>2+</sup> -pH interactions | 234.34                            | 1  | 234.34      | 27.50   | 0.003343 |
| Lack of fit                       | 6330.90                           | 7  | 904.41      |         |          |
| Pure error                        | 42.61                             | 5  | 8.52        |         |          |
| Total                             | 16607.25                          | 19 |             |         |          |
| R <sup>2</sup> =0.616             | R <sup>2</sup> (adjusted) = 0.392 |    |             |         |          |

**Table S7.** ANOVA results for UV-328 removal process in Fe<sup>2+</sup>/PAA system.

| Source of variation               | Sum of squares                    | DF | Mean square | F-value | p-value  |
|-----------------------------------|-----------------------------------|----|-------------|---------|----------|
| PAA (linear)                      | 160.77                            | 1  | 160.77      | 9.74    | 0.026201 |
| PAA (square)                      | 152.78                            | 1  | 152.78      | 9.26    | 0.028646 |
| Fe <sup>2+</sup> (linear)         | 11562.53                          | 1  | 11562.53    | 700.86  | 0.000001 |
| Fe <sup>2+</sup> (square)         | 6686.23                           | 1  | 6686.23     | 405.29  | 0.000006 |
| pH (linear)                       | 573.54                            | 1  | 573.54      | 34.76   | 0.001996 |
| pH (square)                       | 899.23                            | 1  | 899.23      | 54.51   | 0.000717 |
| Fe <sup>2+</sup> -pH interactions | 248.96                            | 1  | 248.96      | 15.09   | 0.011587 |
| Lack of fit                       | 9937.66                           | 7  | 1419.67     |         |          |
| Pure error                        | 82.49                             | 5  | 16.50       |         |          |
| Total                             | 23717.25                          | 19 |             |         |          |
| R <sup>2</sup> =0.577             | R <sup>2</sup> (adjusted) = 0.492 |    |             |         |          |

**Table S8.** ANOVA results for UV-329 removal process in Fe<sup>2+</sup>/PAA system.

| Source of variation               | Sum of squares                    | DF | Mean square | F-value  | p-value  |
|-----------------------------------|-----------------------------------|----|-------------|----------|----------|
| PAA (square)                      | 738.90                            | 1  | 738.90      | 1530.51  | 0.000000 |
| Fe <sup>2+</sup> (linear)         | 7553.60                           | 1  | 7553.60     | 15646.09 | 0.000000 |
| Fe <sup>2+</sup> (square)         | 5010.49                           | 1  | 5010.49     | 10378.43 | 0.000000 |
| pH (linear)                       | 212.72                            | 1  | 212.72      | 440.61   | 0.000005 |
| pH (square)                       | 1663.65                           | 1  | 1663.65     | 3445.99  | 0.000000 |
| PAA-Fe <sup>2+</sup> interactions | 76.59                             | 1  | 76.59       | 158.64   | 0.000056 |
| PAA-pH interactions               | 15.93                             | 1  | 15.93       | 32.99    | 0.002243 |
| Fe <sup>2+</sup> -pH interactions | 99.22                             | 1  | 99.22       | 205.53   | 0.000030 |
| Lack of fit                       | 8731.99                           | 6  | 1455.33     |          |          |
| Pure error                        | 2.41                              | 5  | 0.483       |          |          |
| Total                             | 17929.83                          | 19 |             |          |          |
| R <sup>2</sup> =0.513             | R <sup>2</sup> (adjusted) = 0.492 |    |             |          |          |



**Table S9.** ANOVA results for UV-P removal process in Co<sup>2+</sup>/PAA system.

| Source of variation               | Sum of squares                    | DF | Mean square | F-value  | p-value  |
|-----------------------------------|-----------------------------------|----|-------------|----------|----------|
| PAA (linear)                      | 275.92                            |    | 275.92      | 2786.71  | 0.000000 |
| PAA (square)                      | 11.06                             | 1  | 11.06       | 111.71   | 0.000131 |
| Co <sup>2+</sup> (linear)         | 413.76                            | 1  | 413.76      | 4178.89  | 0.000000 |
| Co <sup>2+</sup> (square)         | 167.60                            | 1  | 167.60      | 1692.75  | 0.000000 |
| pH (linear)                       | 284.97                            | 1  | 284.97      | 2878.08  | 0.000000 |
| pH (square)                       | 485.35                            | 1  | 485.35      | 4901.92  | 0.000000 |
| PAA-Co <sup>2+</sup> interactions | 231.92                            | 1  | 231.92      | 2342.32  | 0.000000 |
| PAA-pH interactions               | 132.66                            | 1  | 132.66      | 1339.87  | 0.000000 |
| Co <sup>2+</sup> -pH interactions | 1114.41                           | 1  | 1114.41     | 11255.24 | 0.000000 |
| Lack of fit                       | 265.26                            | 5  | 52.85       |          |          |
| Pure error                        | 0.49                              | 5  | 0.10        |          |          |
| Total                             | 3046.31                           | 19 |             |          |          |
| R <sup>2</sup> =0.913             | R <sup>2</sup> (adjusted) = 0.835 |    |             |          |          |

**Table S10.** ANOVA results for UV-329 removal process in Co<sup>2+</sup>/PAA system.

| Source of variation               | Sum of squares                    | DF | Mean square | F-value | p-value  |
|-----------------------------------|-----------------------------------|----|-------------|---------|----------|
| PAA (square)                      | 801.37                            | 1  | 801.37      | 54.21   | 0.000726 |
| Co <sup>2+</sup> (square)         | 214.78                            | 1  | 214.78      | 14.53   | 0.012478 |
| pH (square)                       | 466.27                            | 1  | 466.27      | 31.54   | 0.002476 |
| Co <sup>2+</sup> -pH interactions | 497.30                            | 1  | 497.30      | 33.64   | 0.002147 |
| Lack of fit                       | 997.67                            | 10 | 99.77       |         |          |
| Pure error                        | 73.91                             | 5  | 14.78       |         |          |
| Total                             | 2747.51                           | 19 |             |         |          |
| R <sup>2</sup> =0.610             | R <sup>2</sup> (adjusted) = 0.506 |    |             |         |          |

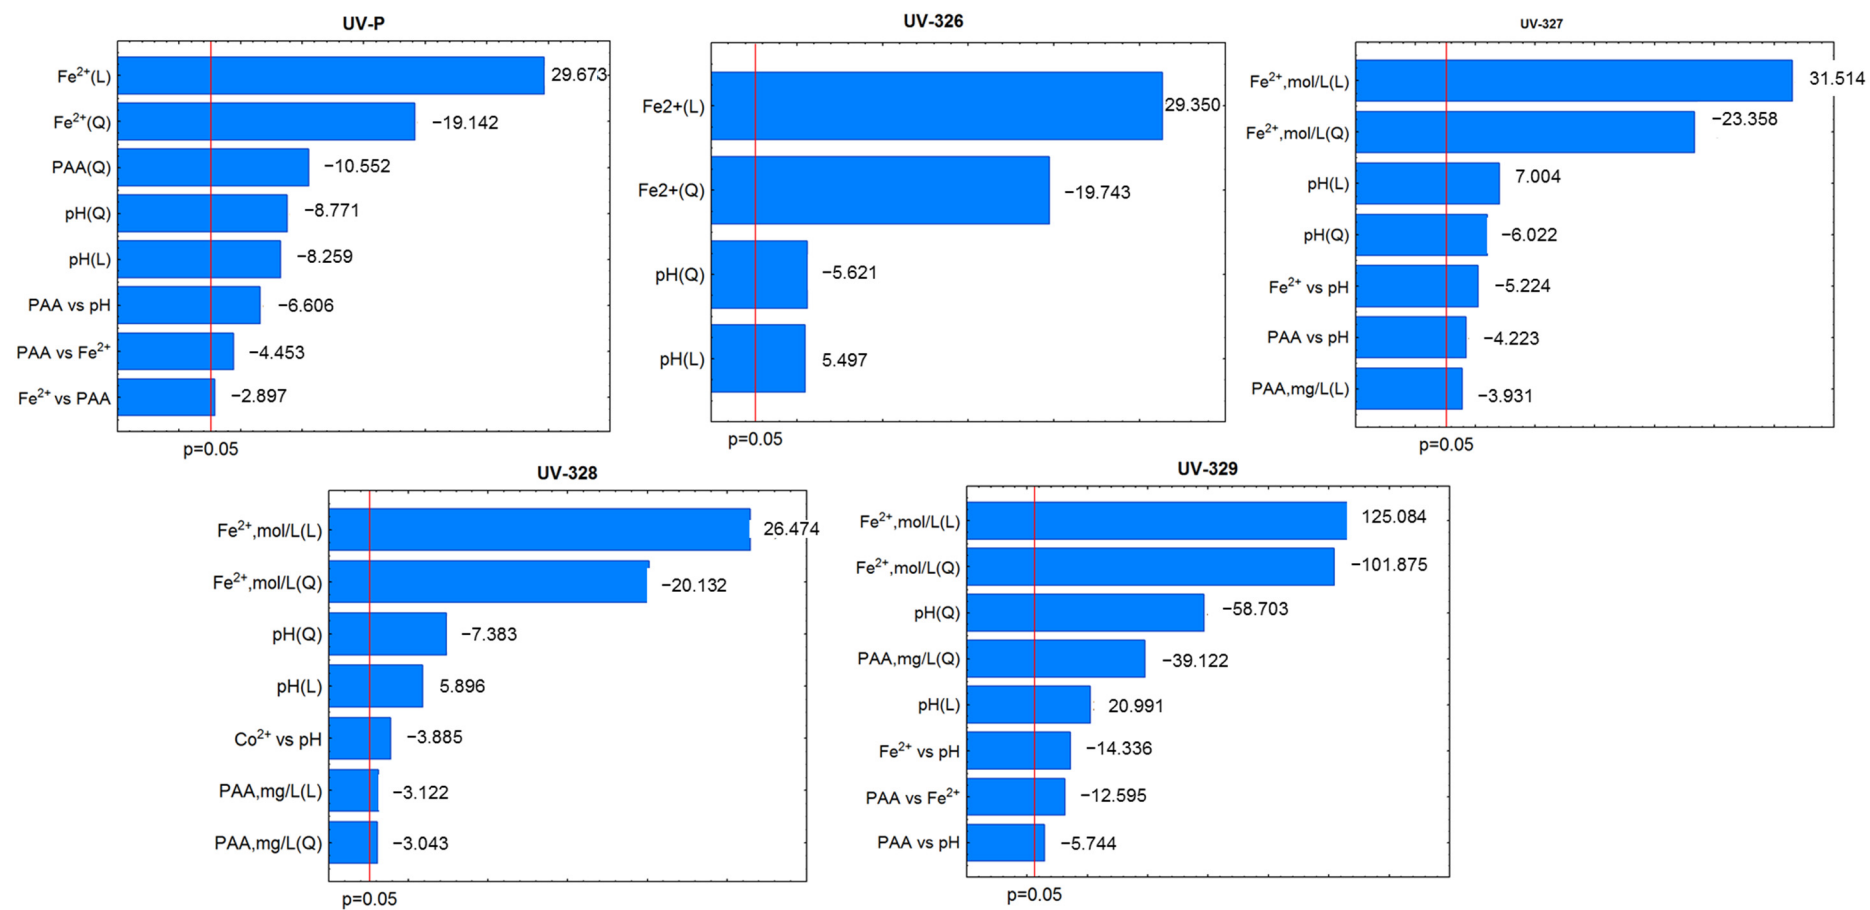

**Figure S5.** Pareto charts showing the influence of factors and their interactions on the individual BUVs removal efficiency in the Fe<sup>2+</sup>/PAA process.

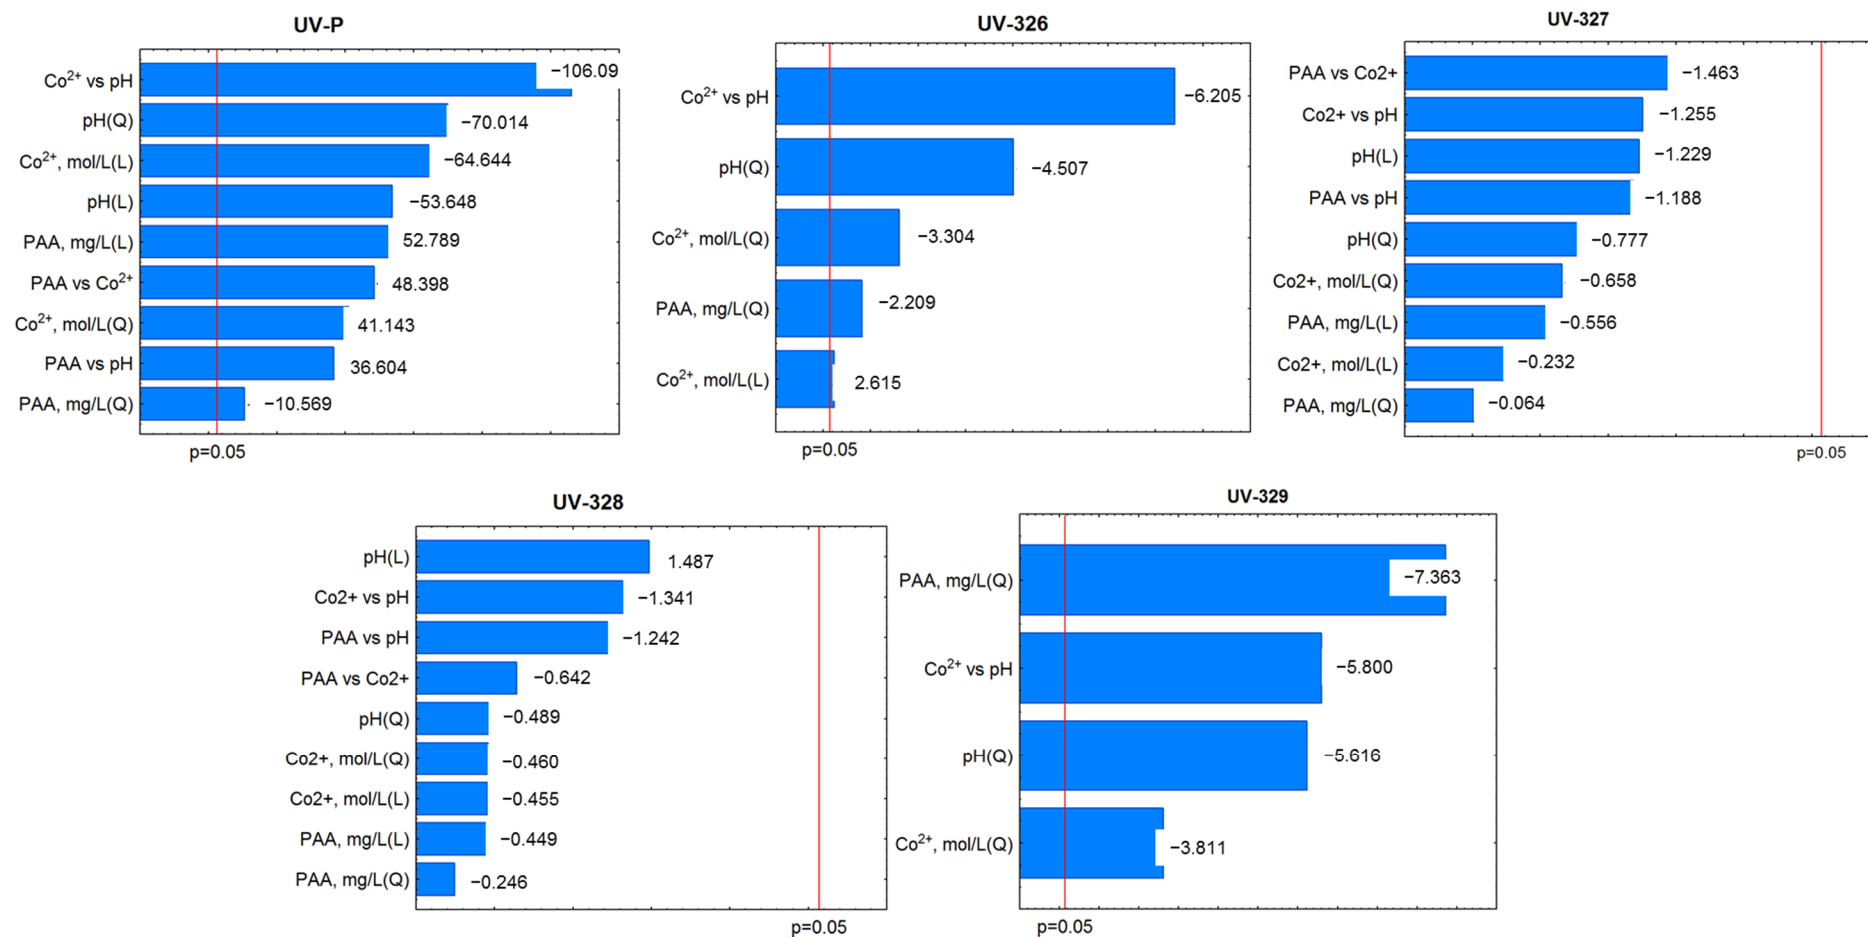

**Figure S6.** Pareto charts showing the influence of factors and their interactions on the individual BUVs removal efficiency in the Co<sup>2+</sup>/PAA process.

UV-P

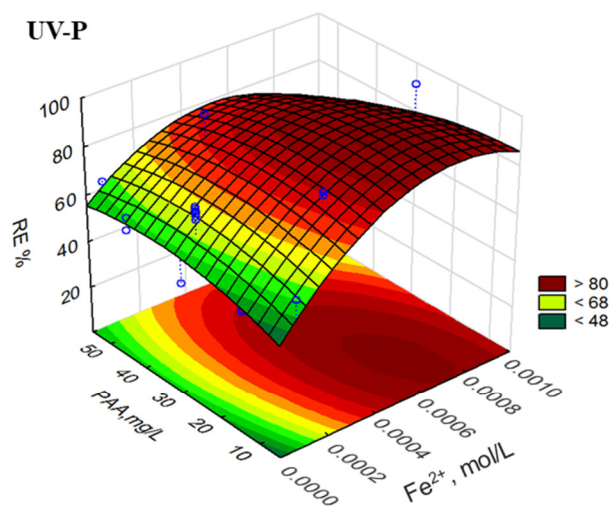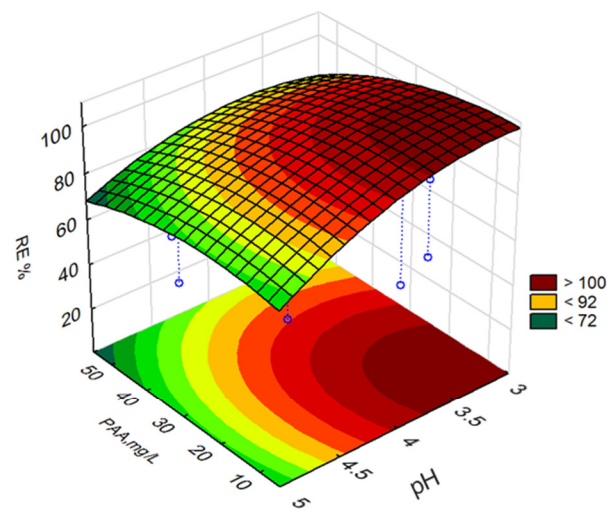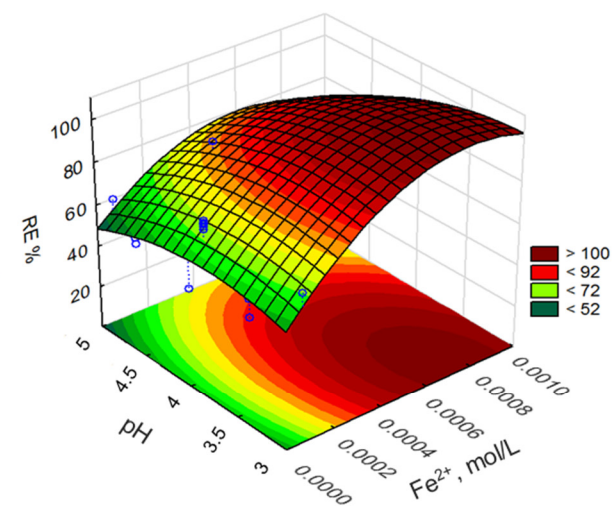

UV-326

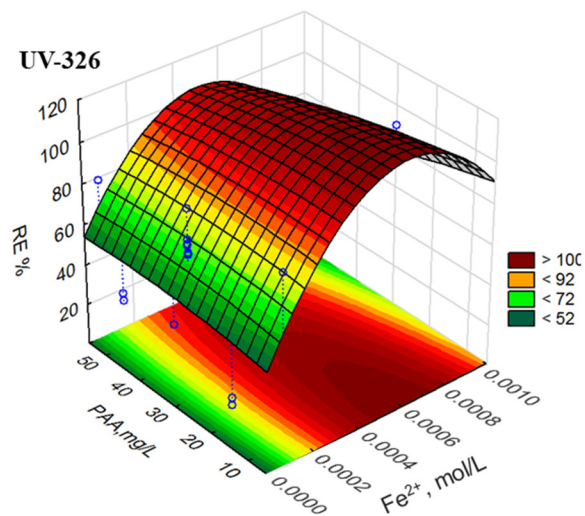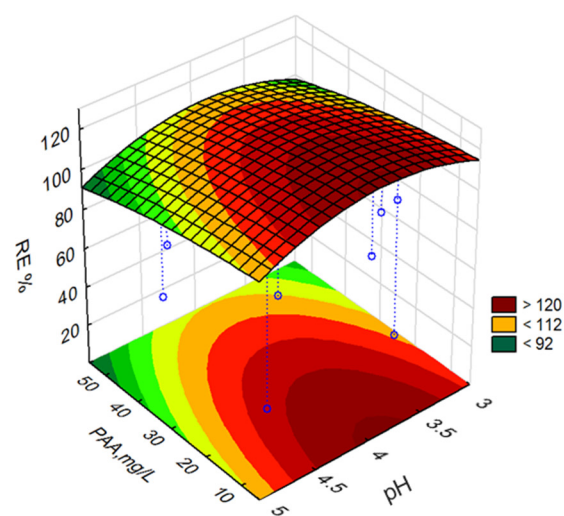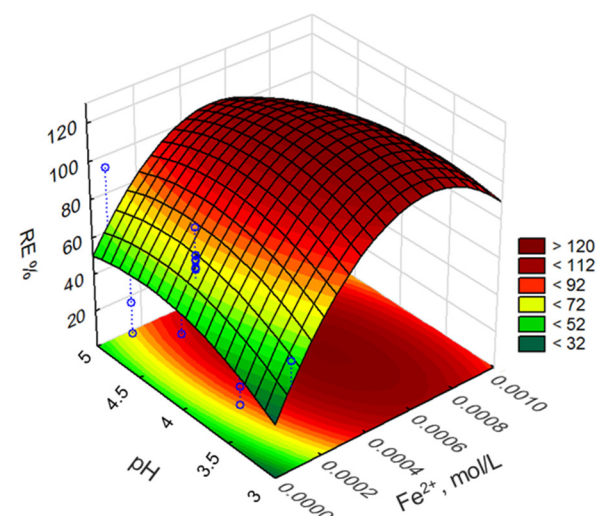

UV-327

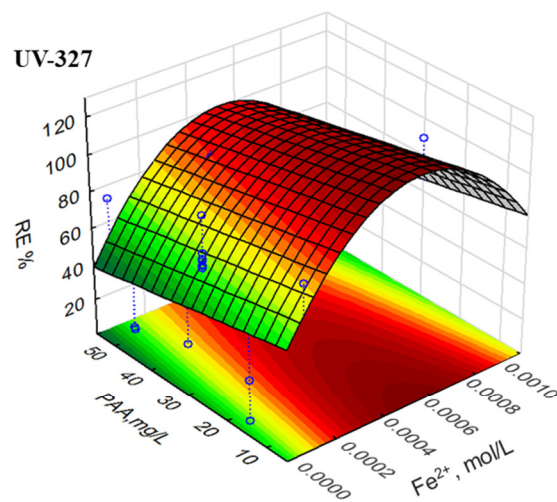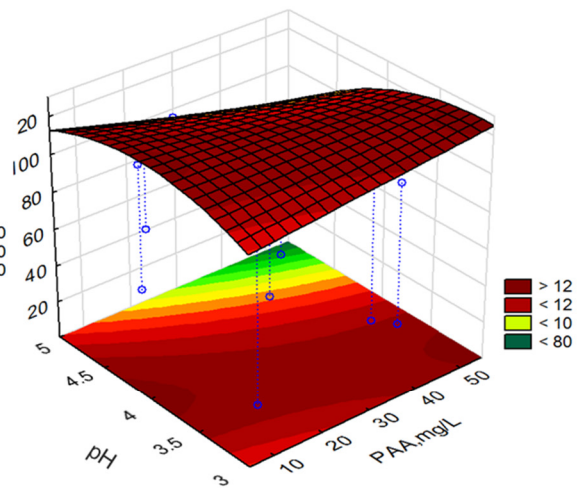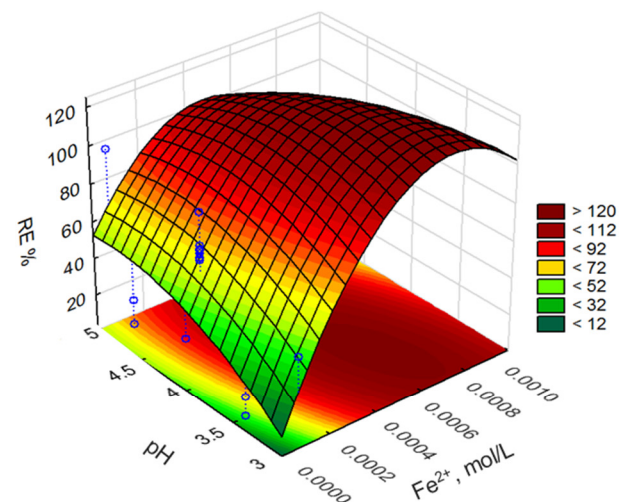

UV-328

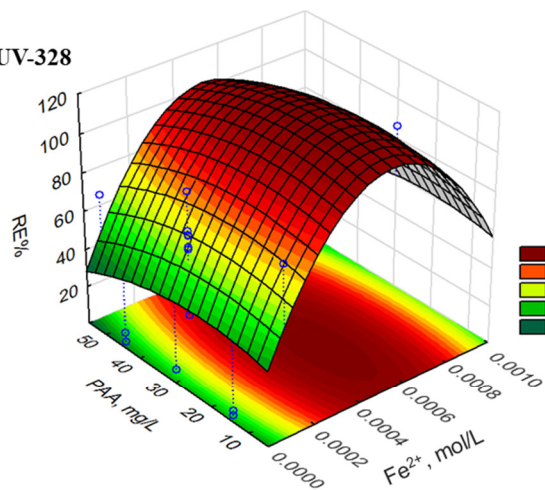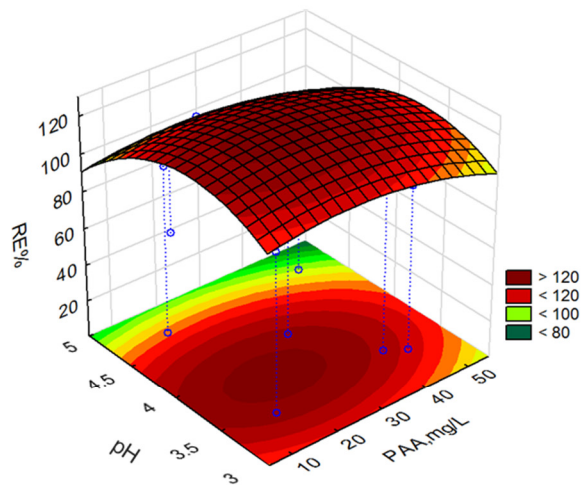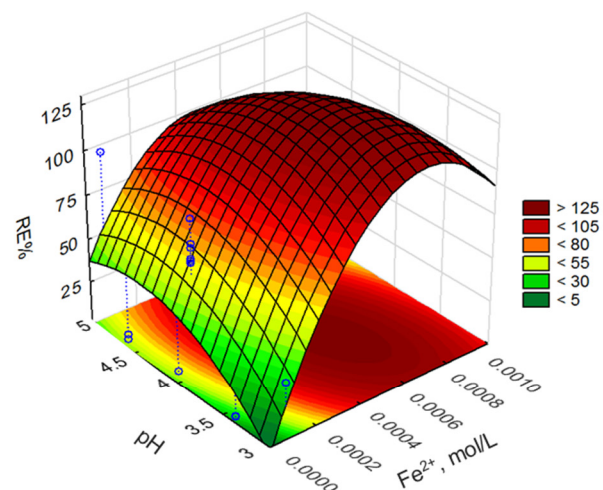



UV-329

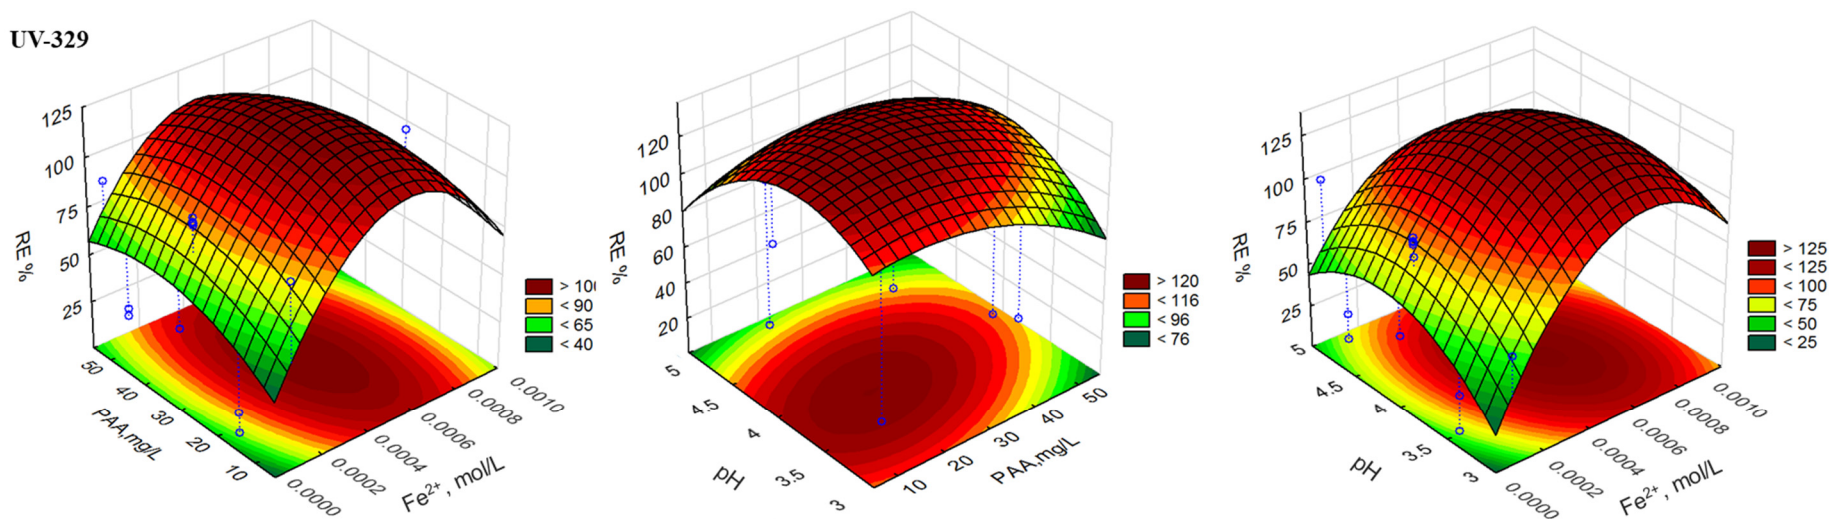

**Figure S7.** Response surface plots of the removal efficiency of studied BUVs in the  $\text{Fe}^{2+}$ /PAA process. Conditions:  $[\text{PAA}]_0 = 25 \text{ mg/L}$ ,  $[\text{Fe}^{2+}]_0 = 6 \cdot 10^{-4} \text{ mol/L}$ ,  $\text{pH} = 4.5$ .

## UV-P

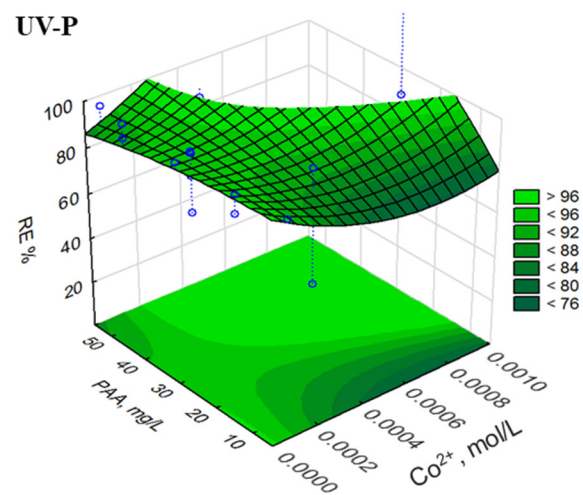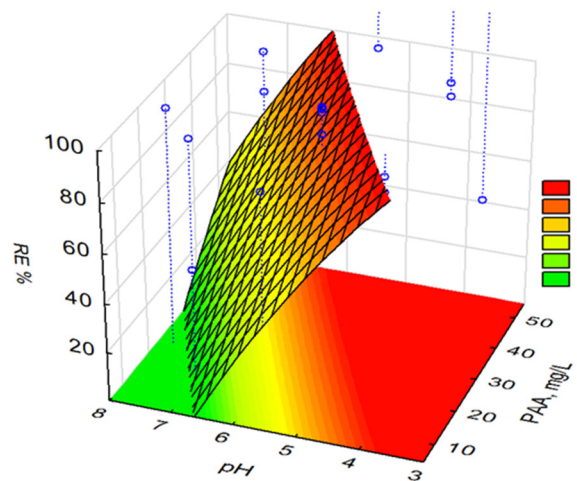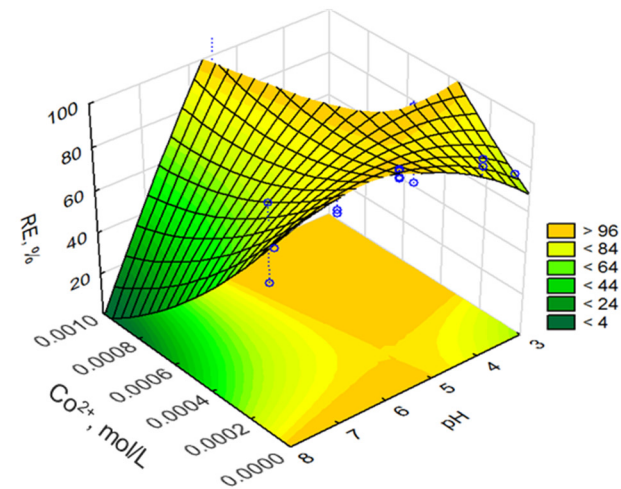

## UV-326

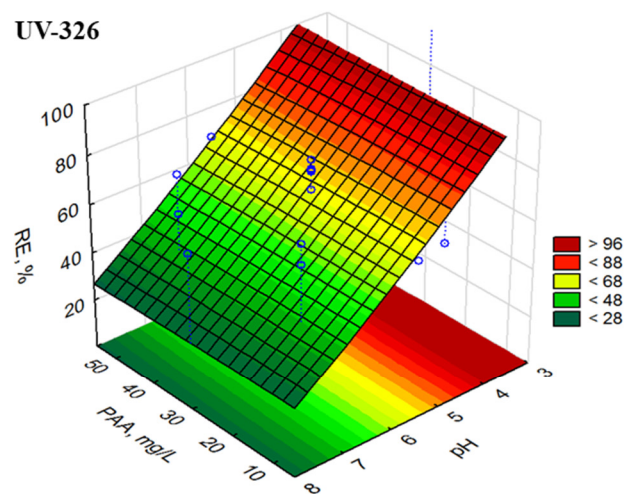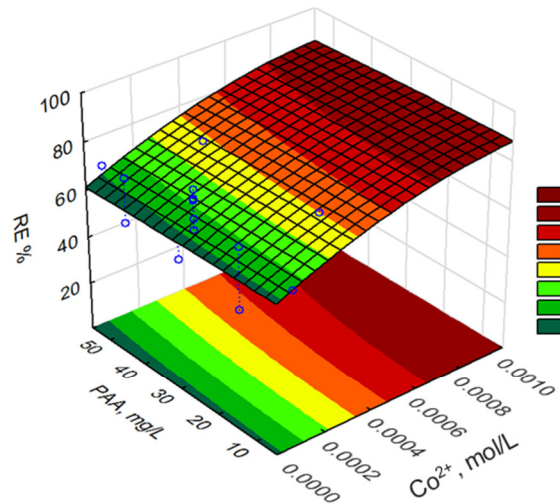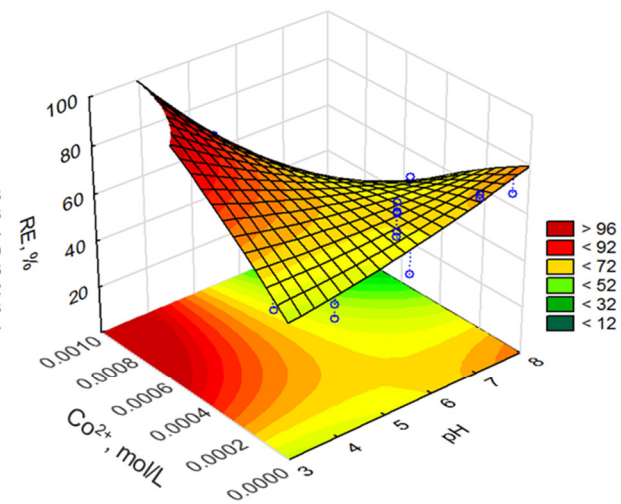



UV-327

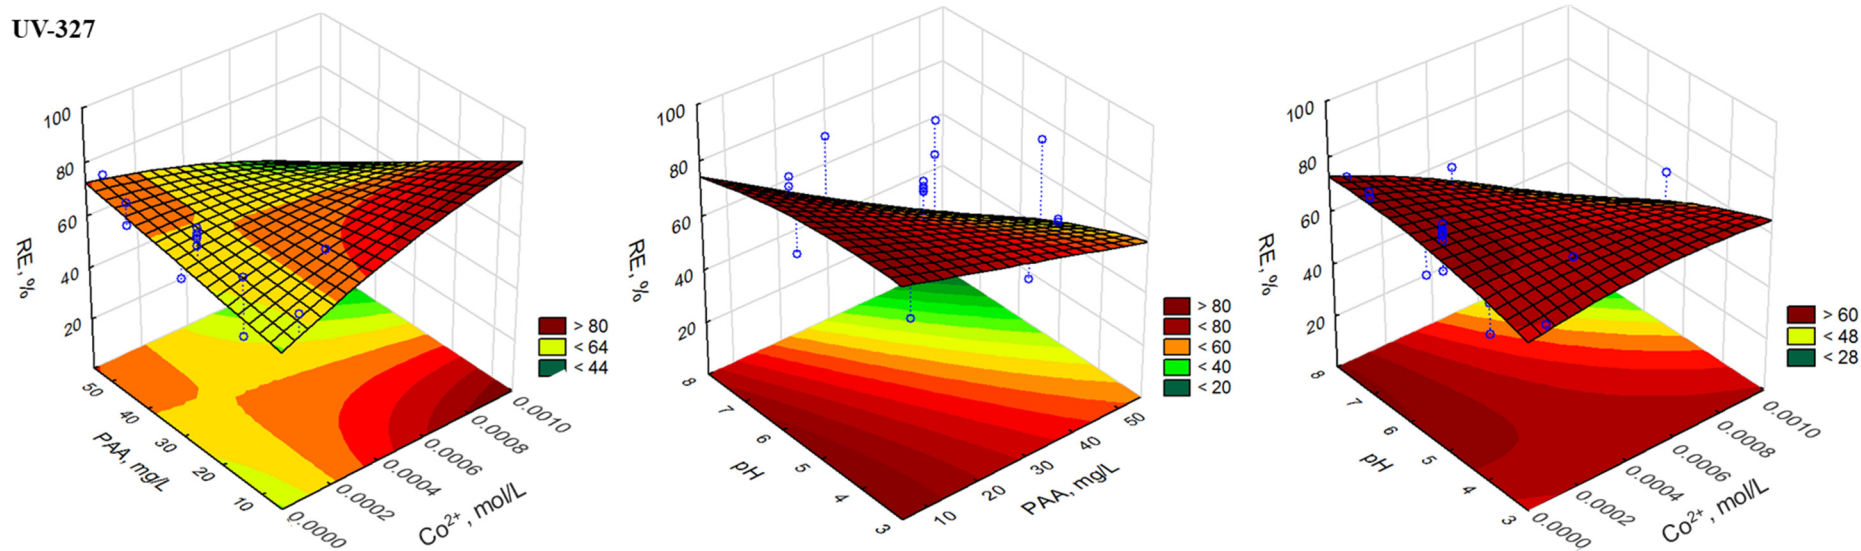

UV-328

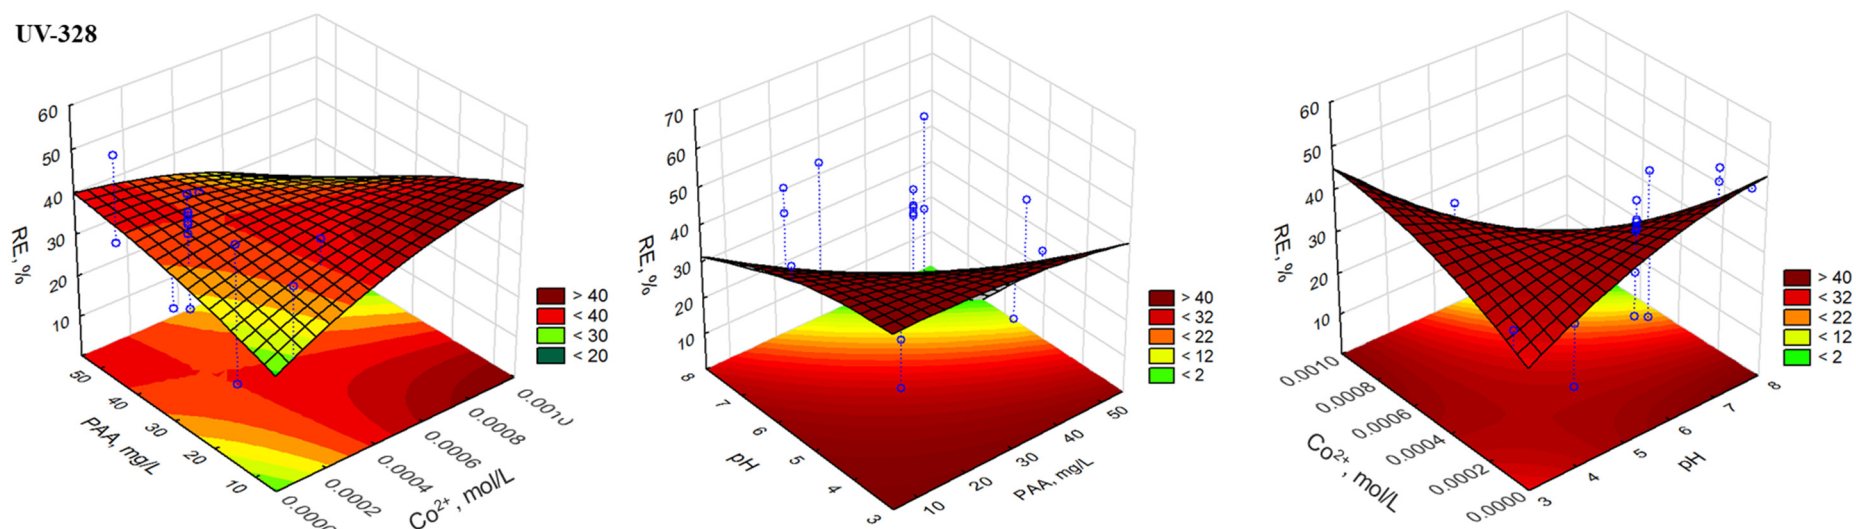

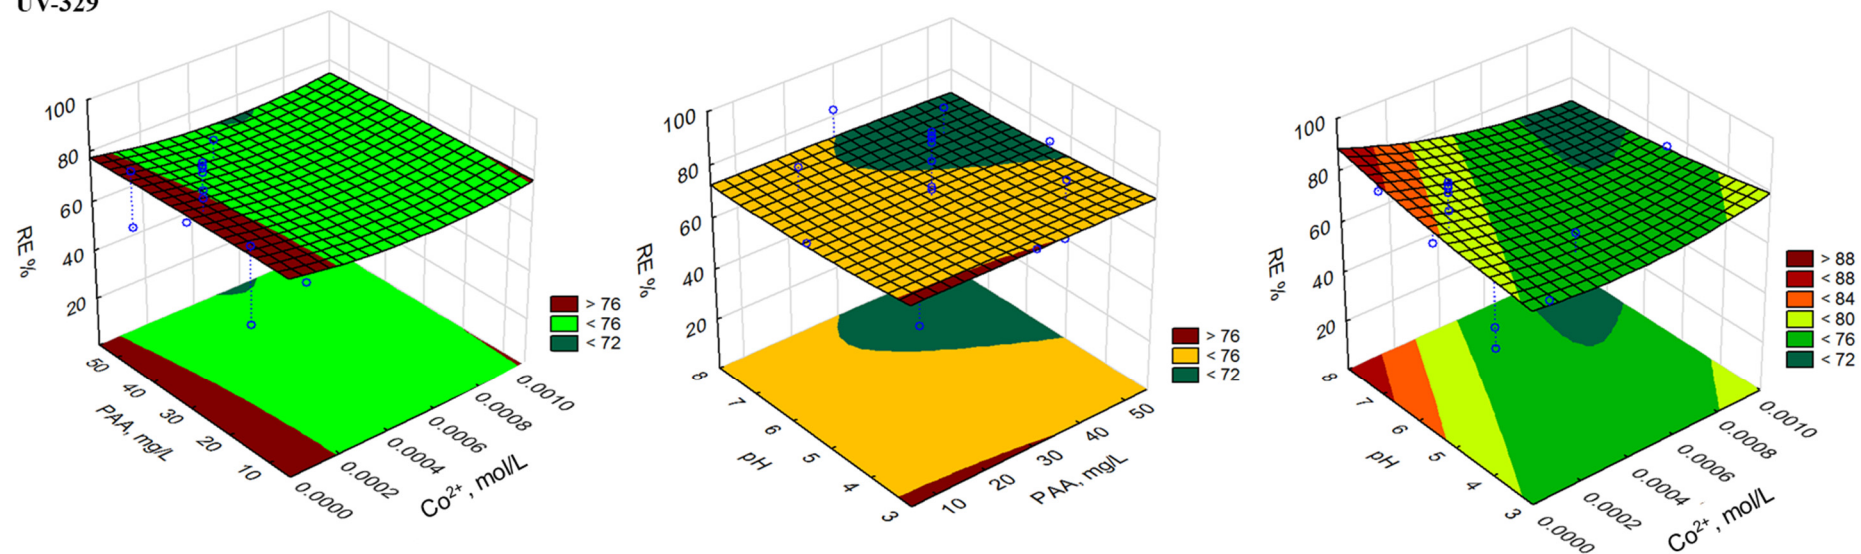

**Figure S8.** Response surface plots of the removal efficiency of studied UVs in the Co<sup>2+</sup>/PAA process. Conditions: [PAA]<sub>0</sub> = 40 mg/L, [Co<sup>2+</sup>]<sub>0</sub> = 8·10<sup>-4</sup> mol/L, pH=4.5.

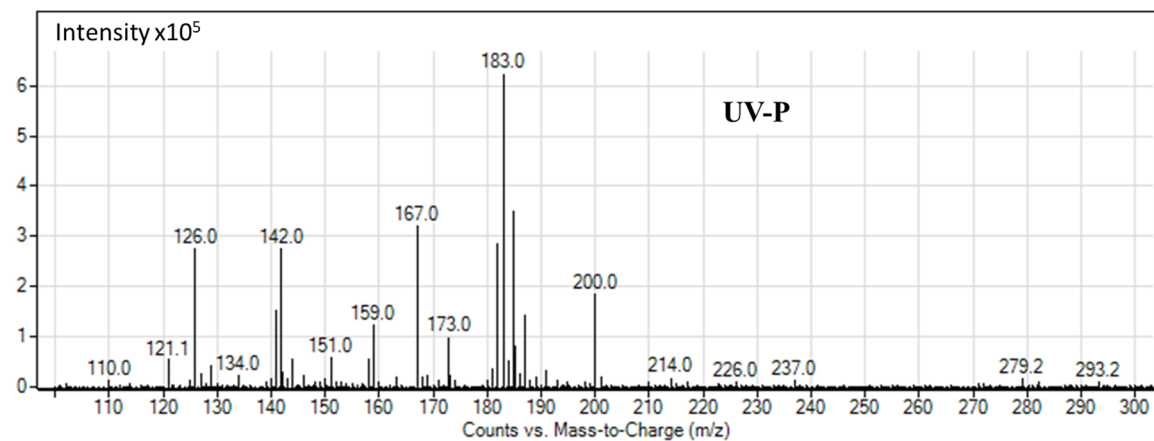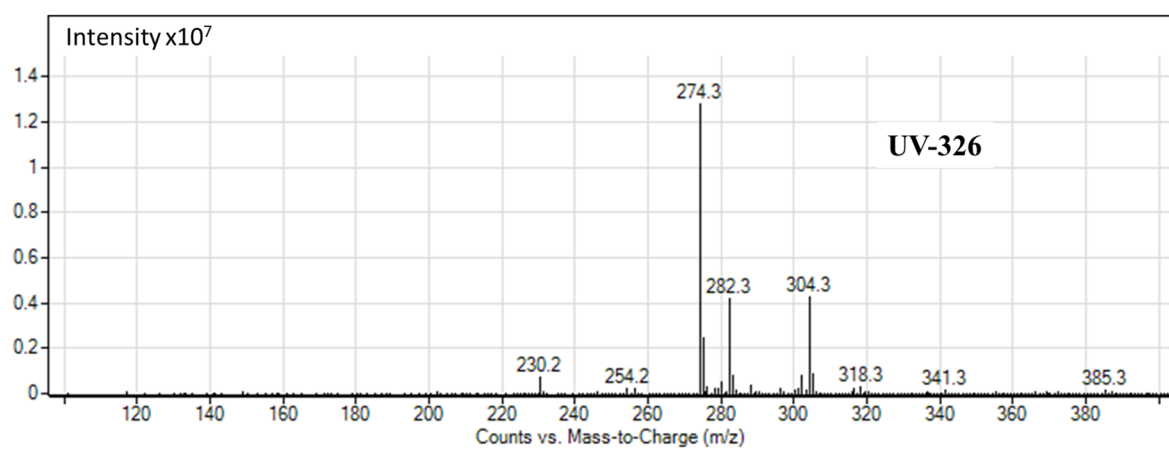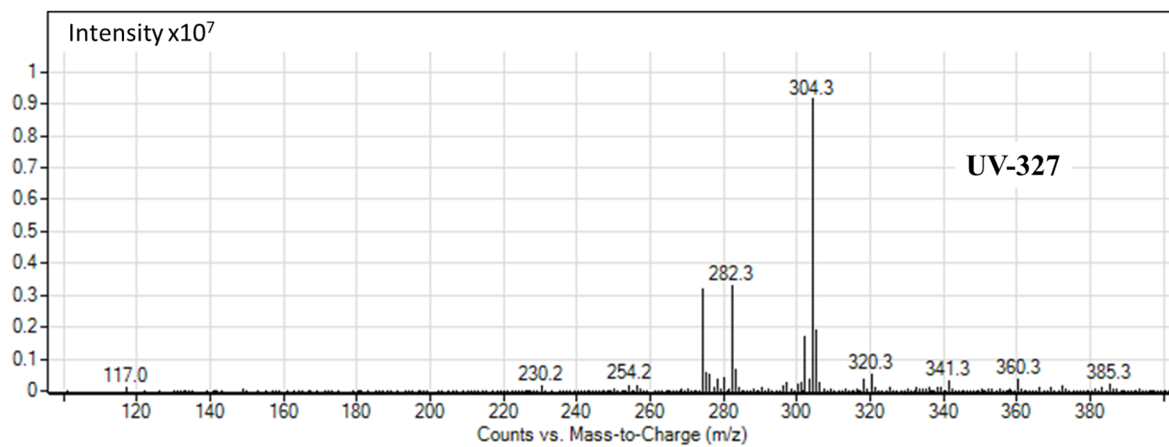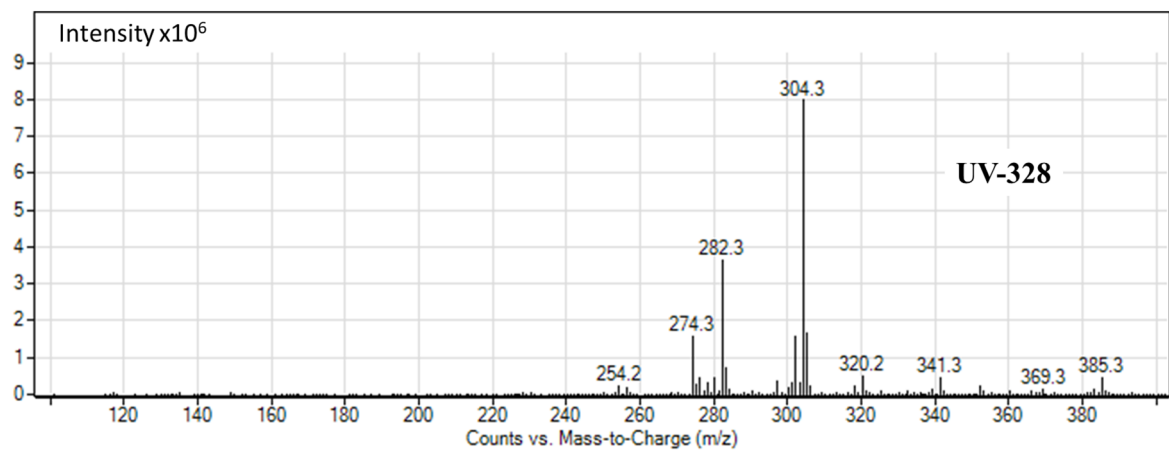

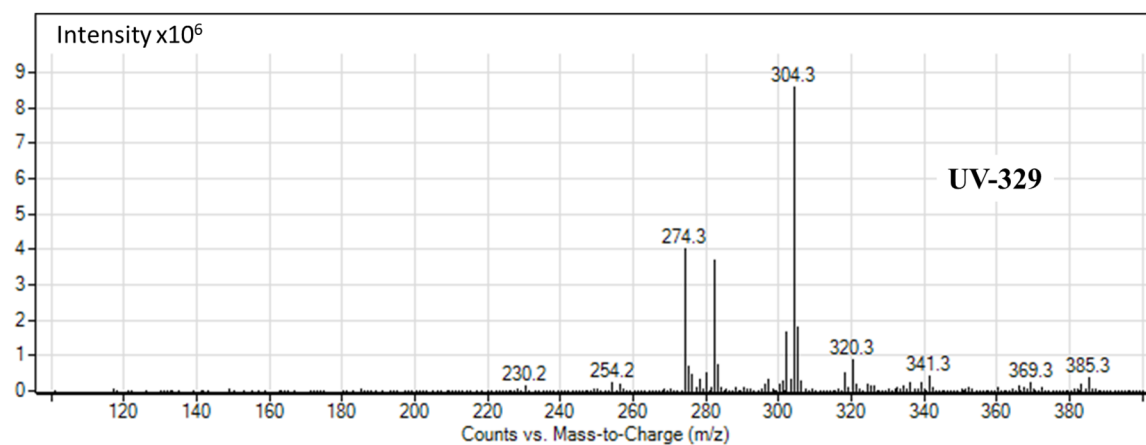

**Figure S9.** Mass spectra of post-reaction mixture.

**Table S11.** Proposed structures of benzotriazole UV stabilizers oxidation products.

| m/z | Proposed structure                                                                                            | m/z | Proposed structure                                                                                                      | m/z | Proposed structure                                                                                                      |
|-----|---------------------------------------------------------------------------------------------------------------|-----|-------------------------------------------------------------------------------------------------------------------------|-----|-------------------------------------------------------------------------------------------------------------------------|
| 119 | 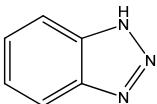<br>Found in: UV-P, UV-328   | 153 | <br>Found in: UV-327, UV-328         | 171 | <br>Found in: UV-P                   |
| 125 | <br>Found in: UV-P, UV-328   | 157 | <br>Found in: UV-328                 | 175 | <br>Found in: UV-P, UV-326           |
| 131 | <br>Found in: UV-P           | 158 | <br>Found in: UV-327                 | 181 | <br>Found in: UV-326, UV-327, UV-329 |
| 150 | <br>Found in: UV-P         | 163 | <br>Found in: UV-328               | 182 | <br>Found in: UV-P                  |
| 151 | <br>Found in: UV-P, UV-326 | 167 | <br>Found in: UV-P, UV-326, UV-328 | 191 | <br>Found in: UV-P, UV-328         |

Table S11 continued

196

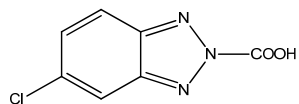

Found in: UV-326, UV-327

231

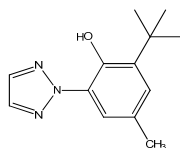

Found in: UV-326, UV-327

241

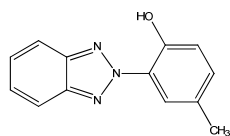

Found in: UV-P

273

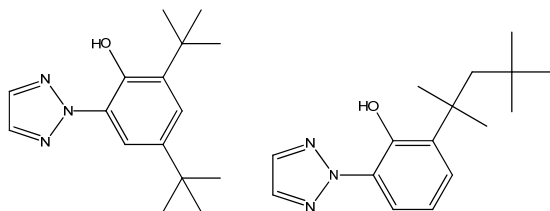

Found in: UV-327, UV-329

275

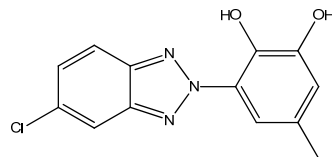

Found in: UV-326

283

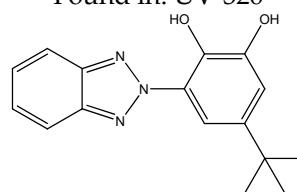

Found in: UV-327

297

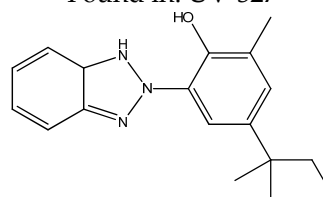

Found in: UV-328

301

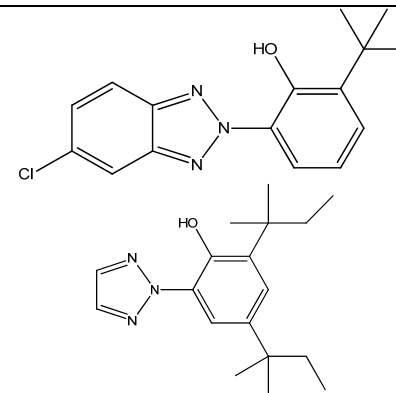

Found in: UV-326, UV-328

317

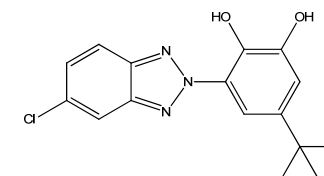

Found in: UV-326, UV-327

347

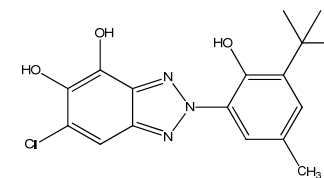

Found in: UV-326, UV-327

---

### *References*

1. Luukkonen, T. New Adsorption and Oxidation-Based Approaches for Water and Wastewater Treatment. Studies Regarding Organic Peracids, Boiler-Water Treatment, and Geopolymers, University of Oulu Graduate School; University of Oulu, Faculty of Science, 2016.
